# Supplementary material for: Competition between Homophily and Information Entropy Maximization in Social Networks
Source: PLOS journal article supplement (doi:10.1371/journal.pone.0136896), 2015-09-03
Supplement: S2 (10.1371/journal.pone.0136896.s002) [file journal.pone.0136896.s002]

## Supporting Information Captions

**S1 Datasets. The datasets download location.** All the real-world data sets employed in this paper is publicly available and they can be downloaded freely from the following permanent location in [figshare.com](https://figshare.com):

- <http://dx.doi.org/10.6084/m9.figshare.1512836>.
